# Supplementary material
Source: PubMed Central journal article supplement (PMC3612886)

**A**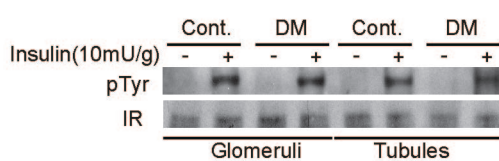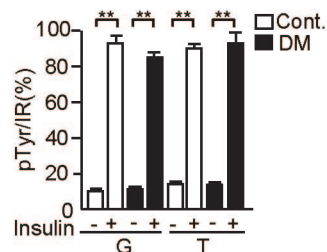**B**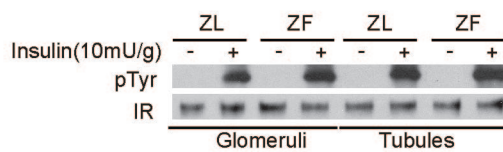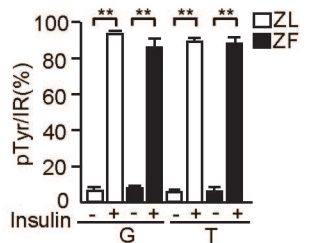**C**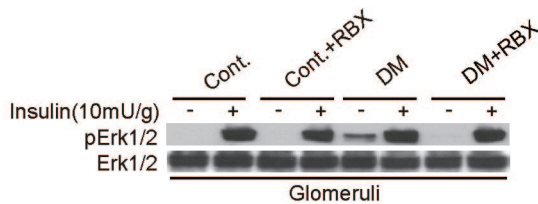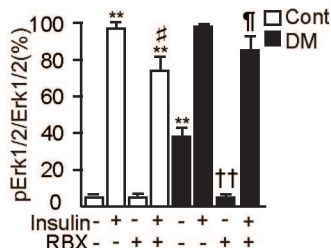**D**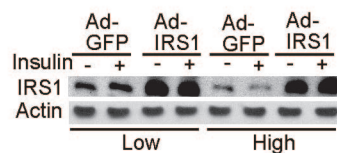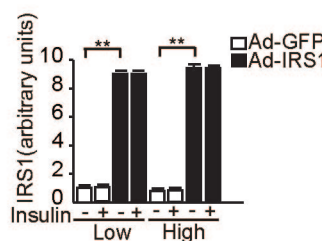**E**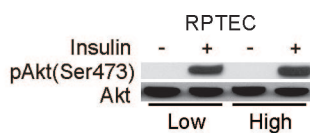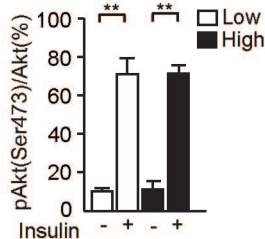**F**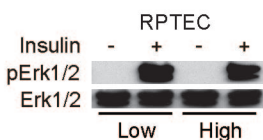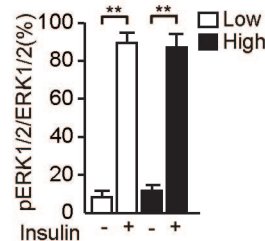**G**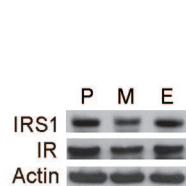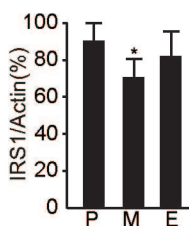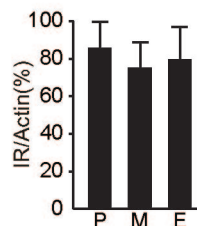

Supplement: NIHMS448326-supplement-Supplemental_Figure.pdf [file NIHMS448326-supplement-Supplemental_Figure.pdf]
